# Supplementary material for: Brain injury accelerates the onset of a reversible age-related microglial phenotype associated with inflammatory neurodegeneration
Source: PubMed Central journal article supplement — Sci Adv. 2023 Mar 8;9(10):eadd1101. doi: 10.1126/sciadv.add1101 (PMC9995070; doi:10.1126/sciadv.add1101), 2023-03-08
Supplement: sciadv.add1101_sm.pdf [file sciadv.add1101_sm.pdf]

Supplementary Materials for  
**Brain injury accelerates the onset of a reversible age-related microglial  
phenotype associated with inflammatory neurodegeneration**

Rodney M. Ritzel *et al.*

Corresponding author: Rodney M. Ritzel, [rodney.m.ritzel@uth.tmc.edu](mailto:rodney.m.ritzel@uth.tmc.edu);  
David J. Loane, [loanedj@tcd.ie](mailto:loanedj@tcd.ie); Junfang Wu, [junfang.wu@som.umaryland.edu](mailto:junfang.wu@som.umaryland.edu)

*Sci. Adv.* **9**, eadd1101 (2023)  
DOI: 10.1126/sciadv.add1101

**This PDF file includes:**

Figs. S1 to S16  
Table S1

## Supplemental Figure 1

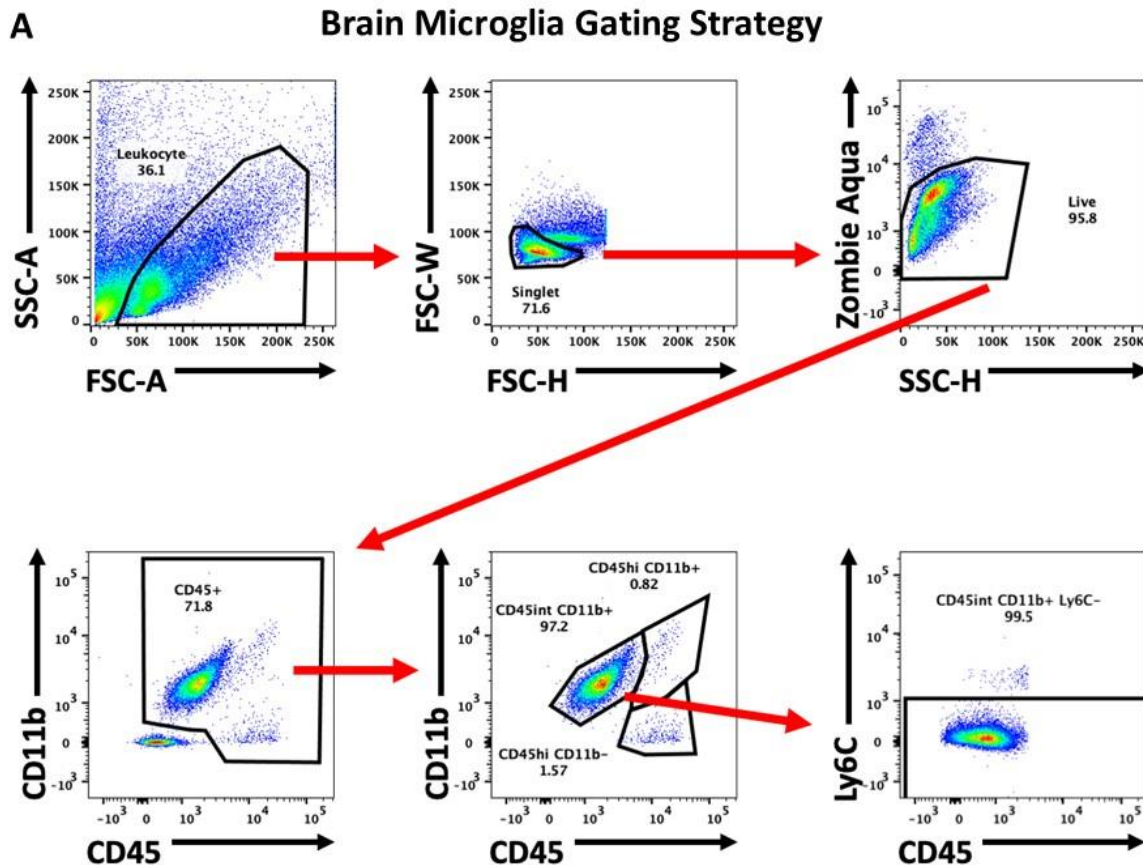

**Fig. S1. Flow cytometry identification of microglia.**

(A) Microglial cells in the brain were identified using the following gating strategy: leukocytes were first identified using a light scatter reference, then singlet gating, viable live cells, CD45 expression, CD45<sup>int</sup>CD11b<sup>+</sup> expression, and finally, Ly6C-negative expression. Abbreviations: FSC forward scatter, hi high, int intermediated, SSC side scatter.

## Supplemental Figure 2

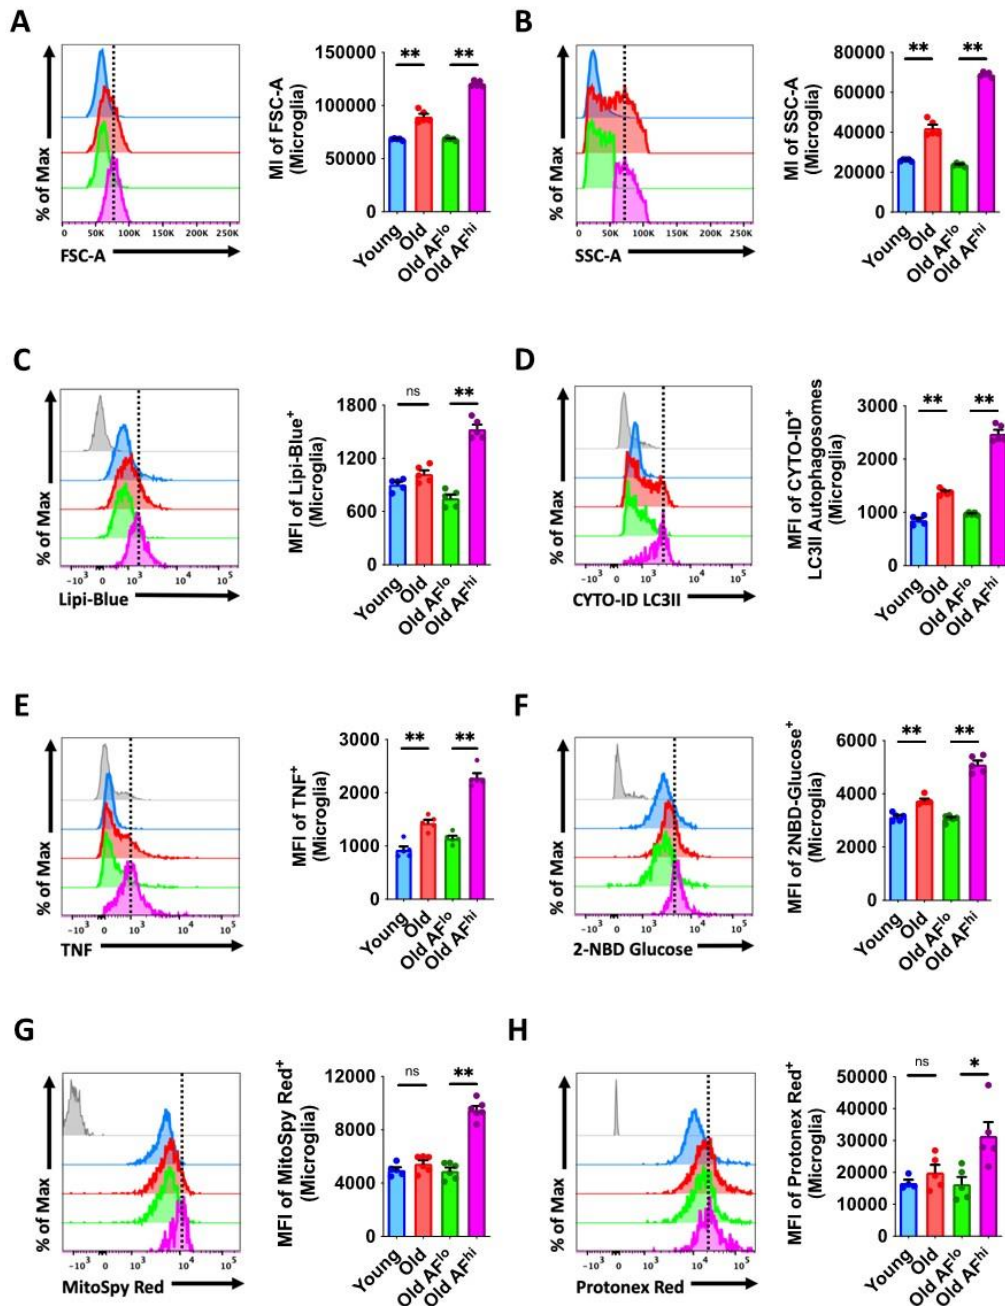

**Fig. S2. Functional evaluation of AF microglia from aged mice.**

Significant changes in cellular function of old AF<sup>hi</sup> versus old AF<sup>lo</sup> microglia subsets largely account for the age-related differences found in the general cell population. Representative histograms show that Old AF<sup>hi</sup> microglia exhibit increases in (A) cell volume, (B) cell granularity, (C) lipid content, (D) autophagosome formation, (E) TNF production, (F) glucose uptake, (G) mitochondrial membrane potential, and (H) cytosolic acidosis. N=5/group. Abbreviations: AF autofluorescent, FSC forward scatter, hi high, lo low, Max maximum, MFI mean fluorescence intensity, ns not significant, SSC side scatter. Non-parametric data were analyzed using Mann-Whitney test (\*\*p<0.01, \*\*\*p<0.001 and \*\*\*\*p<0.0001).

### Supplemental Figure 3

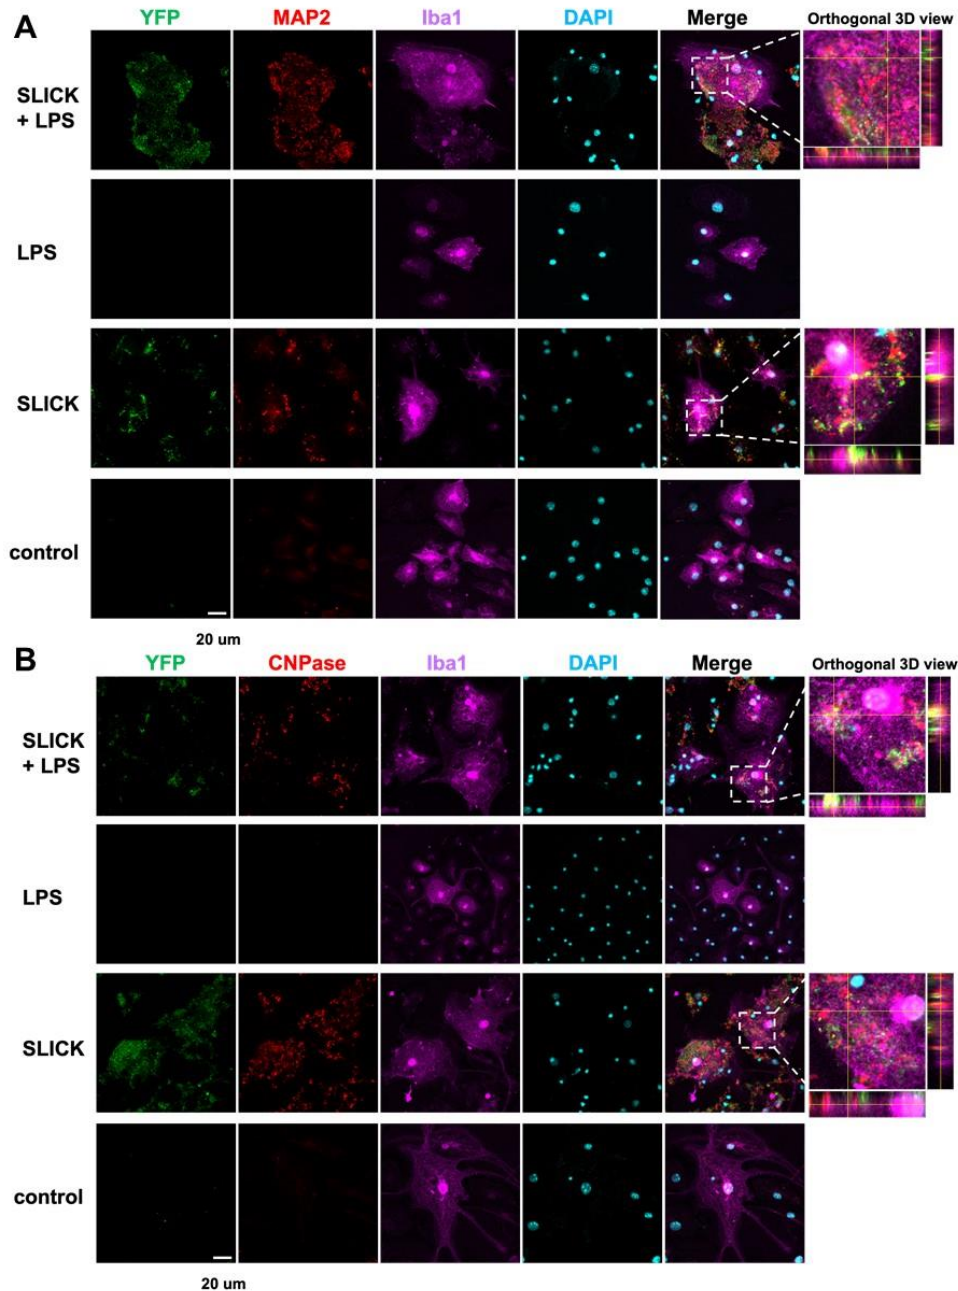

**Fig. S3. Cell culture validation of *ex vivo* neuronal engulfment assay.**

Phagocytosis of SLICK-YFP neurons and myelin by neonatal microglia was demonstrated *in vitro* with and without lipopolysaccharide stimulation (100 ng/ml, 2h) via immunocytochemistry. Two independent experiments were performed to demonstrate the specificity of MAP2 (**A**, in red) and myelin CNPase (**B**, in red) monoclonal antibodies. In the absence of SLICK-YFP neurons (in green), MAP2 neuronal antigen and myelin CNPase antigens were not detected. Abbreviations: LPS lipopolysaccharide, YFP yellow fluorescent protein, MAP2 Microtubule Associated Protein 2, 3D three-dimensional, DAPI 4',6-diamidino-2-phenylindole, Iba1 ionized calcium-binding adapter molecule 1, SLICK single-neuron labeling with inducible Cre-mediated knock-out.

## Supplemental Figure 4

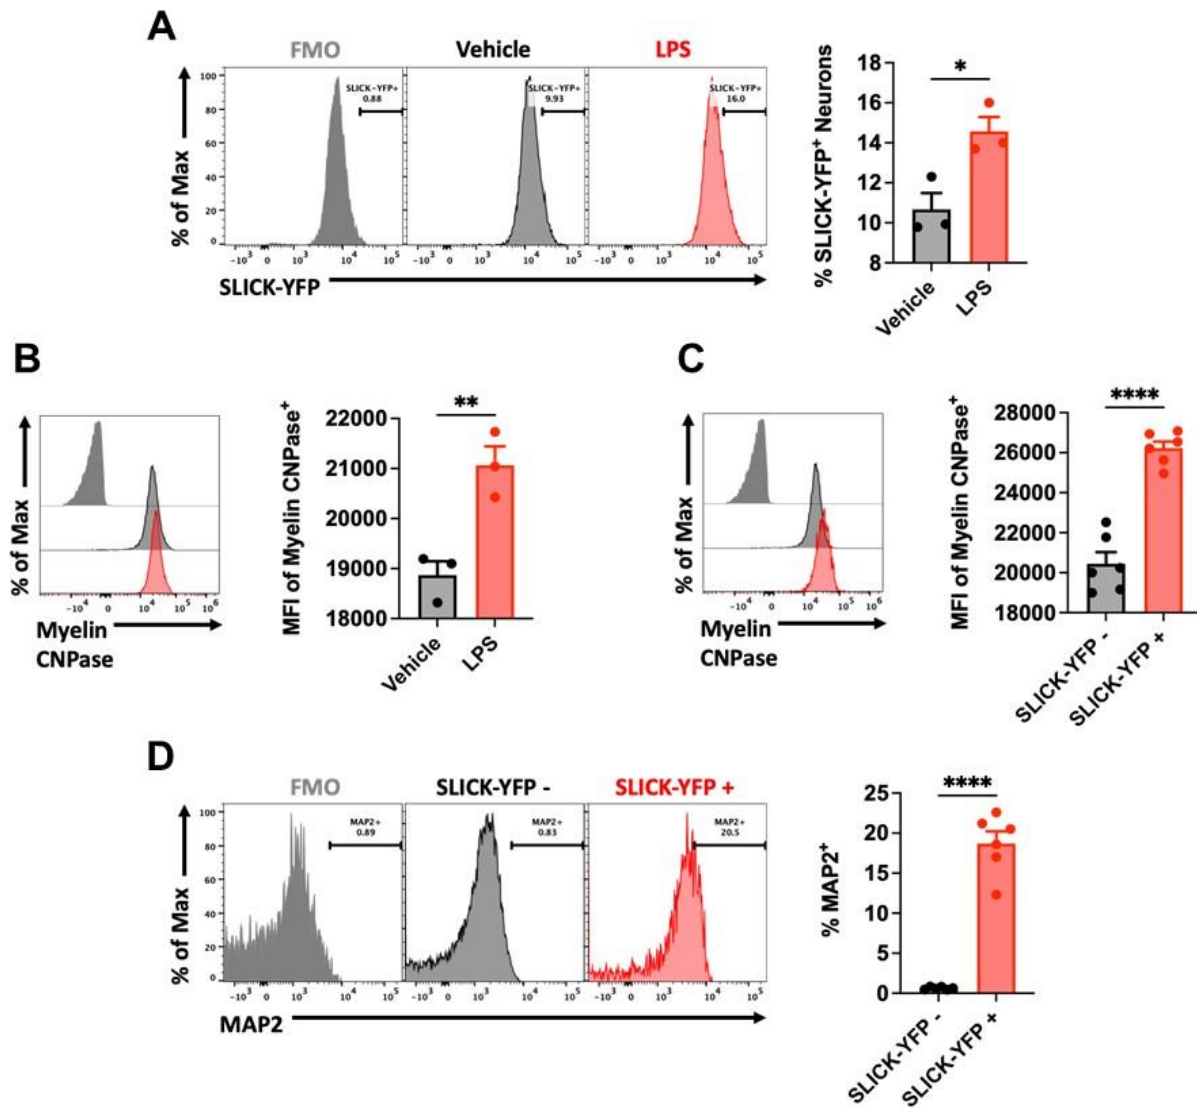

**Fig. S4. Flow cytometry validation of *ex vivo* neuronal engulfment assay.**

Phagocytosis of SLICK-YFP neurons and myelin by neonatal microglia was demonstrated *in vitro* with and without lipopolysaccharide (LPS) stimulation (100 ng/ml, 2h) via flow cytometry. Vehicle and LPS groups were incubated with feeder neurons. LPS stimulation induced microglial phagocytosis of SLICK-YFP neurons (A) and intracellular accumulation of myelin CNPase antigen (B). Microglia that engulfed myelinated SLICK-YFP cortical neurons had significantly higher levels of intracellular myelin CNPase than non-phagocytic microglia (C). Neuronal-derived MAP2 was exclusively detected in phagocytic (i.e., SLICK-YFP-positive) microglia (D). Abbreviations: FMO fluorescence minus one, LPS lipopolysaccharide, Max maximum, YFP yellow fluorescent protein, MFI mean fluorescence intensity, MAP2 Microtubule Associated Protein 2. N=3-6/group. Data were analyzed by Student's t-test (\* $p < 0.05$ , \*\* $p < 0.01$ , and \*\*\*\* $p < 0.0001$ ).

## Supplemental Figure 5

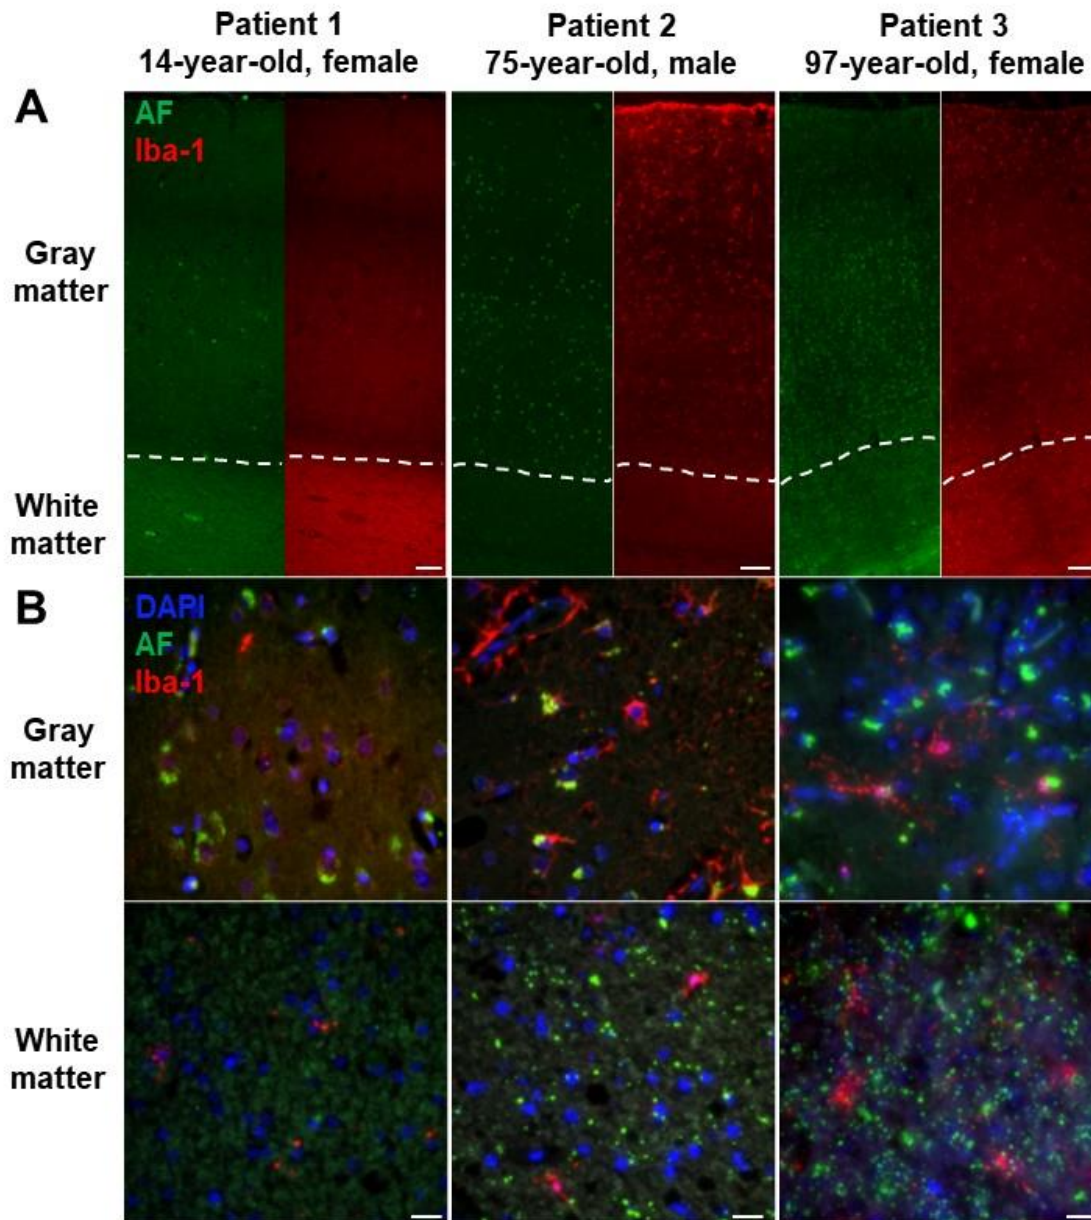

**Fig. S5. Evidence and distribution of autofluorescent microglia in cortical sections of post-mortem human brain tissue.**

Immunohistochemistry was performed on human control brains in which no neuropathology was diagnosed before or after autopsy. Microglial autofluorescence in gray and white matter is shown in the somatosensory and visual cortex of young adult (Patient 1, 14-year-old), aged 1 (Patient 2, 75-year-old), and aged 2 (Patient 3, 97-year-old). AF puncta (in green, empty FITC channel) can be seen inside Iba-1-positive microglia/macrophages (in red) counterstained with DAPI (in blue). AF microglia are more noticeable in the gray versus white matter regions of the cortex at all ages. Scale bars = 100  $\mu\text{m}$  (A) and 20  $\mu\text{m}$  (B). Abbreviations: AF autofluorescence, Iba-1 ionized calcium-binding adapter molecule 1, DAPI 4',6-diamidino-2-phenylindole.

# Supplemental Figure 6

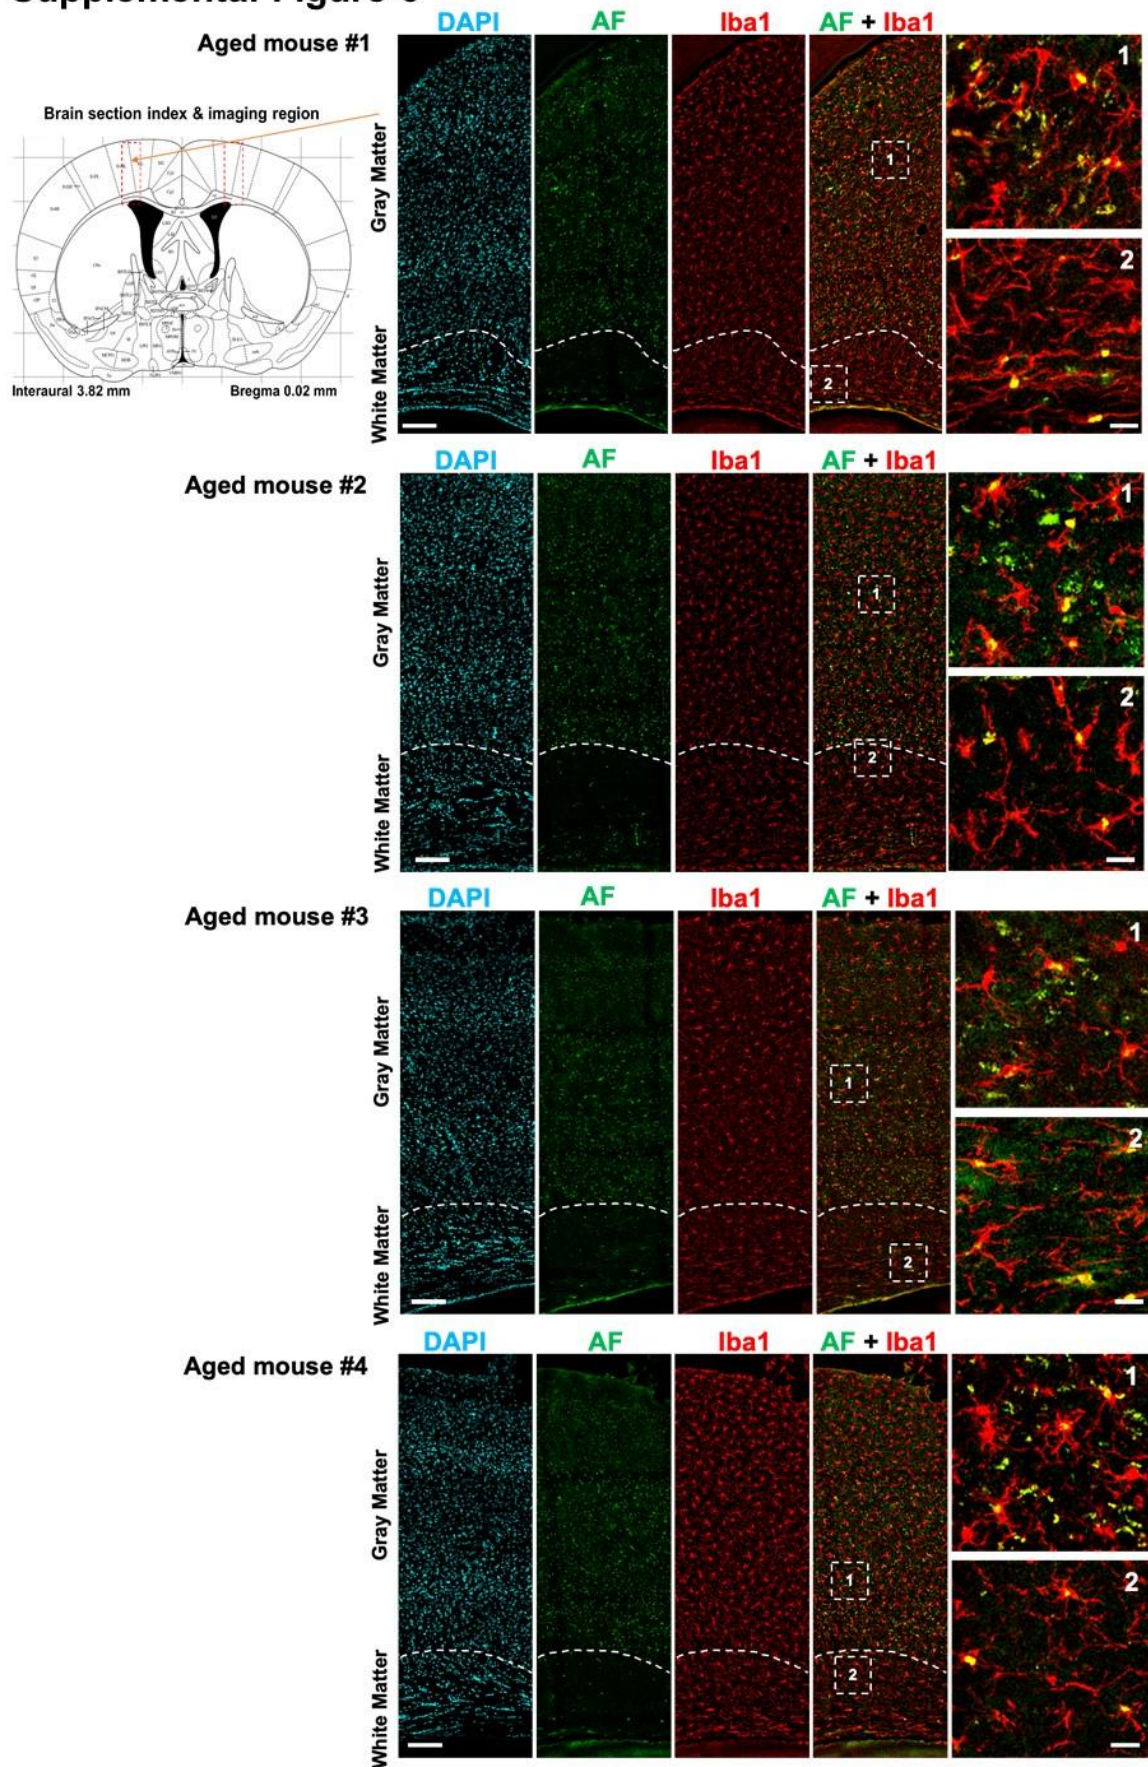

**Fig. S6. Distribution of autofluorescent microglia in the aged murine cortex.**

Immunohistochemistry was performed on coronal brain sections of normal aged (18-month-old) male mice. Microglial autofluorescence in gray and white matter is shown in the indicated cortex according to the anatomical diagram (top left). Images from four individual mice are shown. AF puncta (in green, empty FITC channel) can be seen inside Iba1-positive microglia/macrophages (in red) counterstained with DAPI (in blue). Upon higher magnification, AF microglia are especially apparent in the gray (labeled box 1) versus white matter (labeled box 2) regions within the same cortical section. Scale bars =100  $\mu\text{m}$  (left panels) and 20  $\mu\text{m}$  (right panels). Abbreviations: AF autofluorescence, Iba1 ionized calcium-binding adapter molecule 1, DAPI 4',6-diamidino-2-phenylindole.



# Supplemental Figure 7

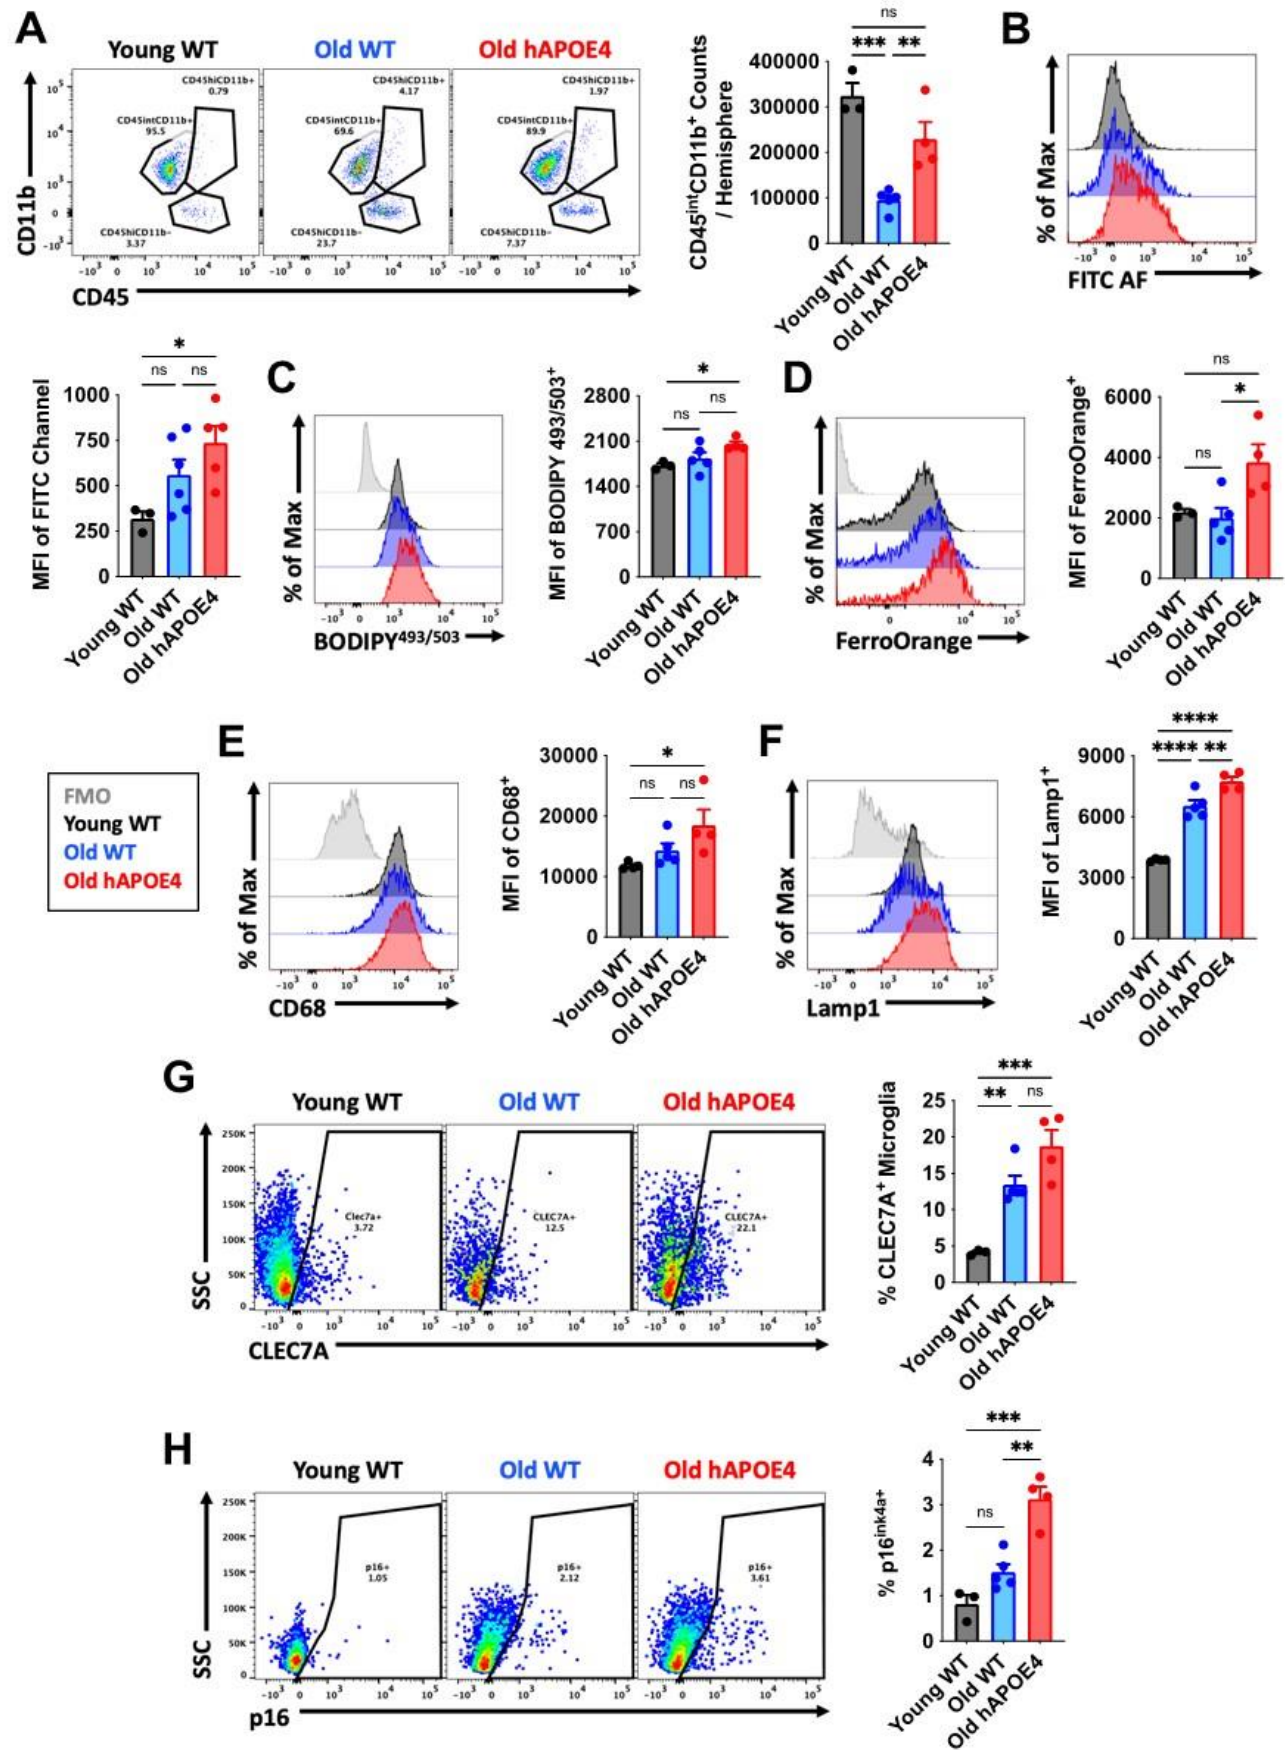

**Fig. S7. Age-associated AF phenotype is modified by hAPOE4 genotype.**

(A) A representative dot plot illustrates the immune composition in the brain of young and aged C57BL/6, and old, age-matched hAPOE<sup>+/+</sup> knock-in mice. Microglia from aged hAPOE4 mice displayed significantly higher (B) autofluorescence, (C) lipid content, (D) iron concentration, and expression of (E) CD68, (F) Lamp1, (G) CLEC7a, and (H) p16<sup>ink4a</sup> compared to either young or old wildtype controls. Abbreviations: AF autofluorescence, FMO fluorescence minus one control, max Maximum, MFI mean fluorescence intensity, ns not significant, SSC side scatter, WT wildtype. Data (A-H) were analyzed using one-way ANOVA with multiple comparisons (N=3-6/group; \*p<0.05, \*\*p<0.01, \*\*\*p<0.001, and \*\*\*\*p<0.0001).

## Supplemental Figure 8

### 4wks post-Repopulation Cellular Profile of Sequenced Microglia

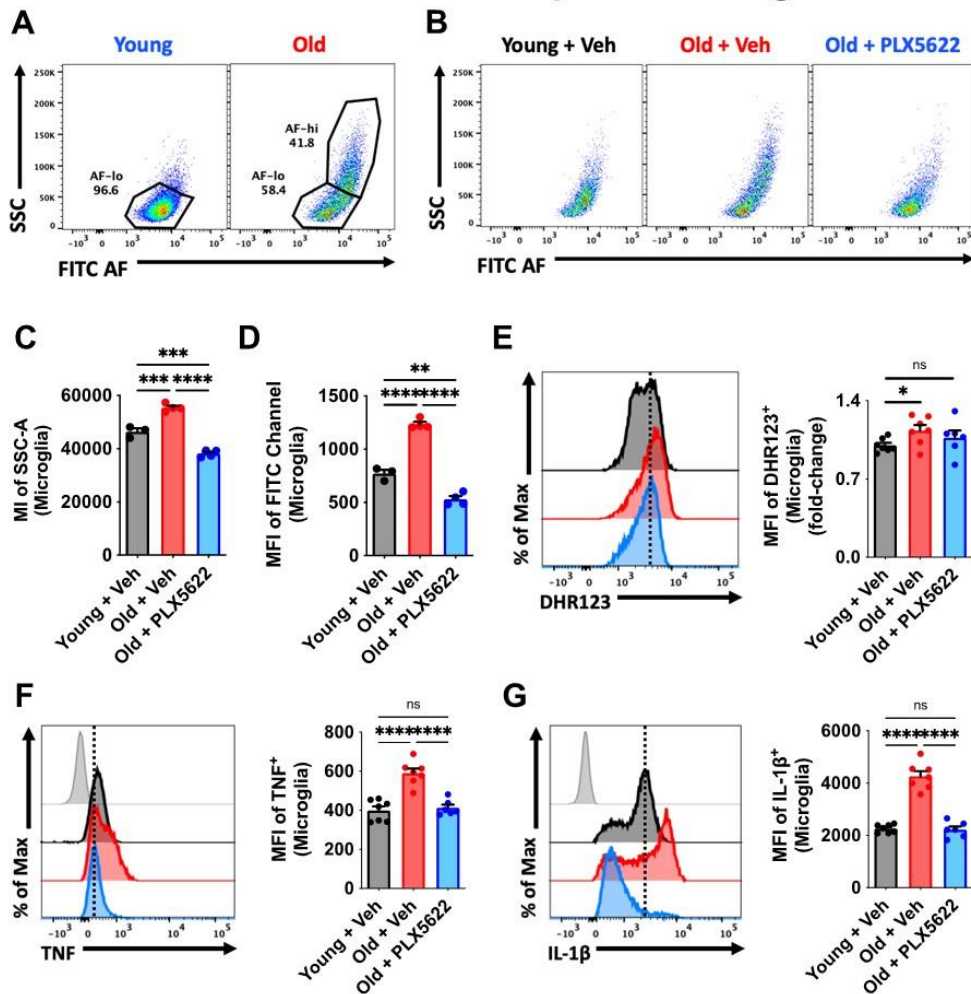

**Fig. S8. Cellular profile of microglia sorted for RNA sequencing.**

Two sets of experiments were performed to sort microglia for downstream RNA sequencing. In the first, living CD45<sup>int</sup>CD11b<sup>+</sup>Ly6C<sup>-</sup> microglia from young and old wildtype C57Bl/6 male mice were sorted based on the relative level of cellular autofluorescence in the FITC channel (A). FACS sorted microglial subsets (e.g., Old AF<sup>lo</sup> and Old AF<sup>hi</sup>) in the first experiment were confirmed autofluorescent based on relative intensity in the FITC channel with respect to the young (i.e., AF<sup>lo</sup>) group. In the second experiment, rather than sorting by subset, bulk CD45<sup>int</sup>CD11b<sup>+</sup>Ly6C<sup>-</sup> microglia from young and old vehicle groups and old treatment groups were sorted for comparison (B). Validation of the PLX5622 treatment effect in the bulk sorted groups was performed to show the significant decrease in (C) cellular granularity and (D) autofluorescence level in microglia following four weeks of repopulation. Microglial production of reactive oxygen species (E) and the pro-inflammatory cytokines, TNF (F) and IL-1 $\beta$  (G) are shown. N=3-4/group (C-D) and 6-7/group (E-G). Abbreviations: AF autofluorescent, hi high, lo low, MI mean intensity, MFI mean fluorescence intensity, SSC side scatter, Veh vehicle. Data (C-G) were analyzed using one-way ANOVA with multiple comparisons (\*\*p<0.01, \*\*\*p<0.001 and \*\*\*\*p<0.0001).

## Supplemental Figure 9

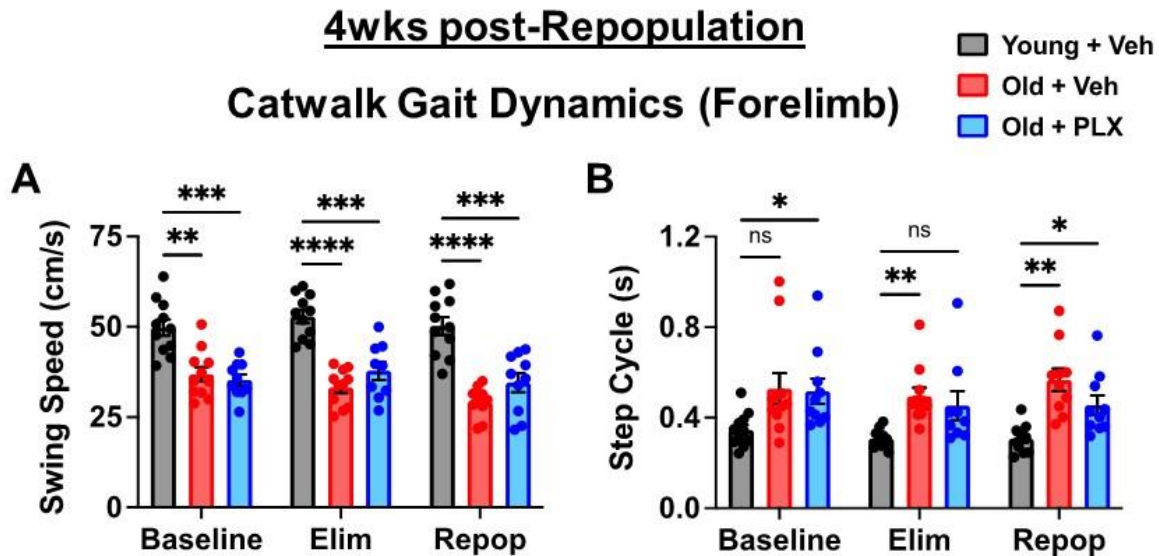

**Fig. S9. Assessment of motor function at 4-weeks post-repopulation.**

Additional gait measures for forelimb (A) swing speed and (B) step cycle at four weeks post-repopulation are shown. N=9-11/group. Abbreviations: cm centimeters, Elim elimination phase, ns not significant, PLX PLX5622, Repop repopulation phase, s seconds, Veh vehicle, wks weeks. Data were analyzed using two-way ANOVA with repeated measures (\* $p < 0.05$ , \*\* $p < 0.01$ , \*\*\* $p < 0.001$ , and \*\*\*\* $p < 0.0001$ ).

**Supplemental Figure 10**  
**4wks post-Repopulation**  
**Cerebellum Cytokine Concentrations**

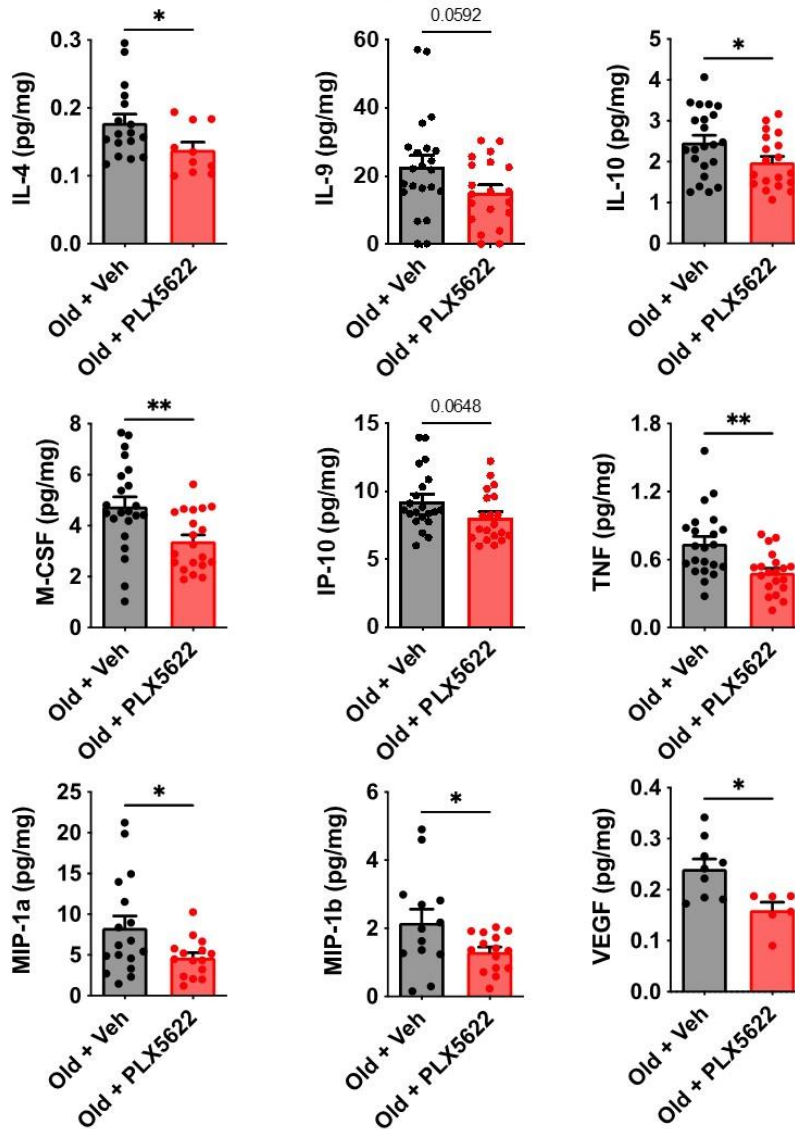

**Fig. S10. Cytokine analysis in the aged cerebellum at four weeks after microglial repopulation.**

Inflammation in the cerebellum of old mice was examined to better understand the treatment effects on age-related motor function. Out of the 32 analytes tested in a multiplex enzyme-linked immunosorbent assay of inflammatory cytokines, those which were detectable and statistically significant or trending after treatment are shown. Four weeks after microglial repopulation, cerebellar concentrations of IL-4, IL-10, M-CSF, TNF, MIP-1a, MIP-1b, and VEGF were all significantly reduced compared to the vehicle group. Concentrations of IL-9 and IP-10 showed a non-statistical trend for decrease after treatment. N=7-23/group (due to differences in detectability between cytokines). Abbreviations: mg milligram, pg picogram, Veh vehicle. Data were analyzed using Student's t-test (\* $p < 0.05$  and \*\* $p < 0.01$ ).

# Supplemental Figure 11

## 4wks post-Repopulation Catwalk Gait Dynamics (Hindlimb)

■ Young + Veh  
■ Old + Veh  
■ Old + PLX5622

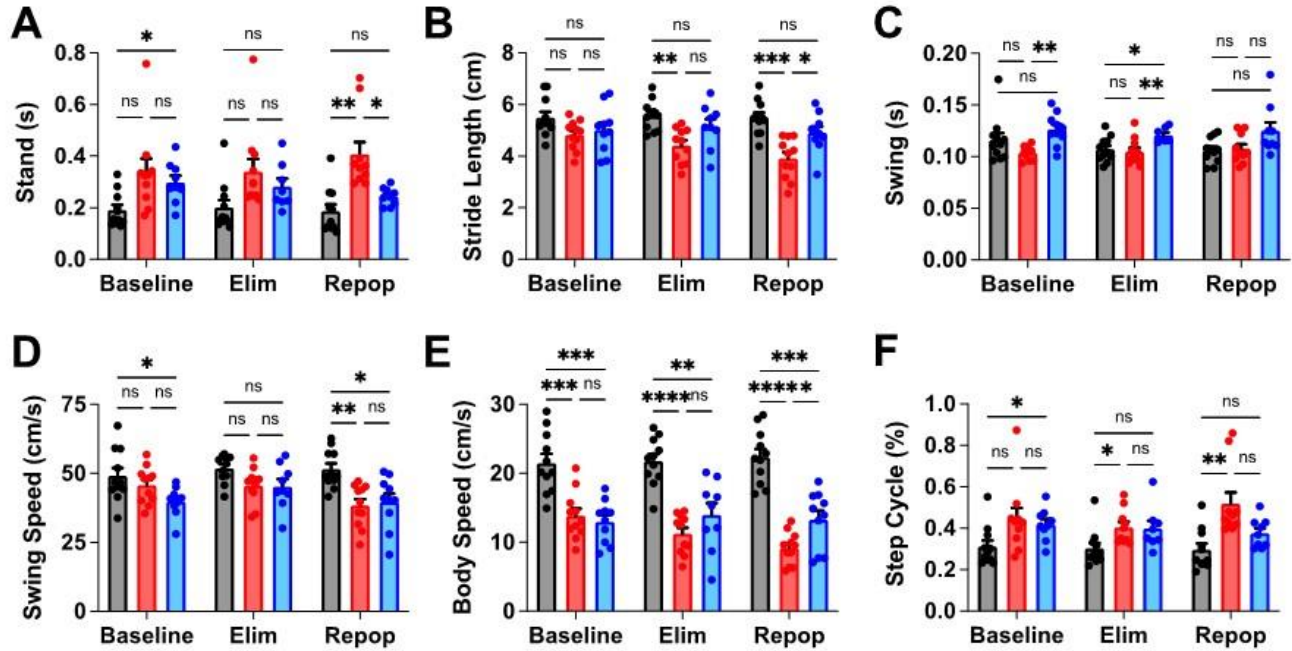

## 12wks post-Repopulation Catwalk Gait Dynamics (Hindlimb)

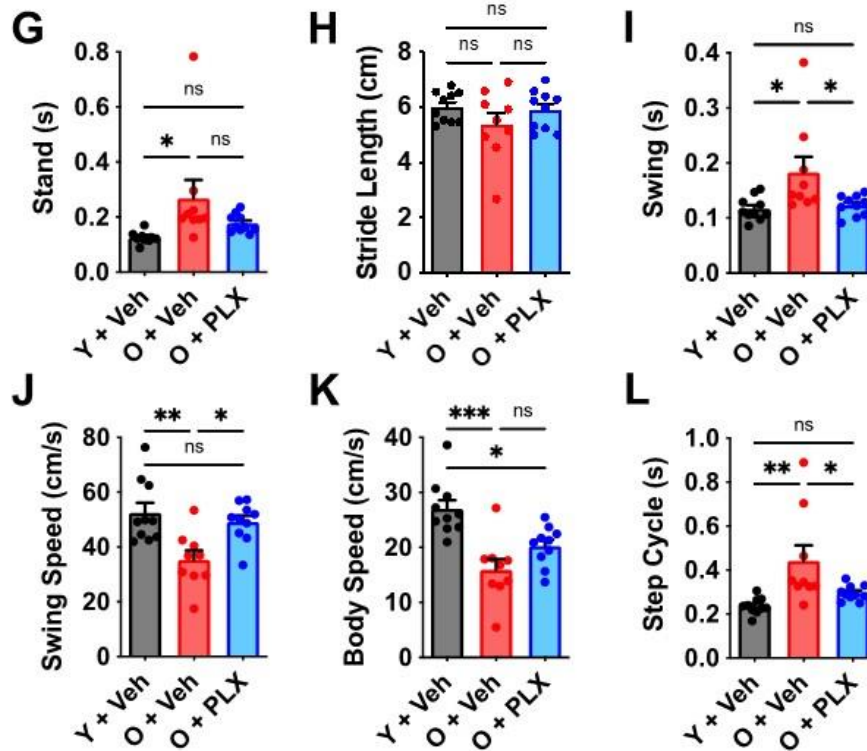

**Fig. S11. Assessment of hindlimb gait dynamics at 4- and 12-weeks post-repopulation.**

Gait measures for hindlimb (A) stand, (B) stride length, (C) swing, (D) swing speed, (E) body speed, and (F) step cycle at four weeks post-repopulation are shown. At 12 weeks post-repopulation, hindlimb measures for (G) stand, (H) stride length, (I) swing, (J) swing speed, (K) body speed, and (L) step cycle parameters generally mirror that seen in the forelimbs. N=10-11/group (A-F), and 9-10/group (G-L). Abbreviations: cm centimeters, BW body weight, Elim elimination phase, g grams, ns not significant, O old, PLX PLX5622, Repop repopulation phase, s seconds, Veh vehicle, wks weeks, Y young. Data (A-F) were analyzed using two-way ANOVA with repeated measures. Data (G-L) were analyzed using one-way ANOVA with multiple comparisons (\*p<0.05, \*\*p<0.01, \*\*\*p<0.001, and \*\*\*\*p<0.0001).

Supplemental Figure 12

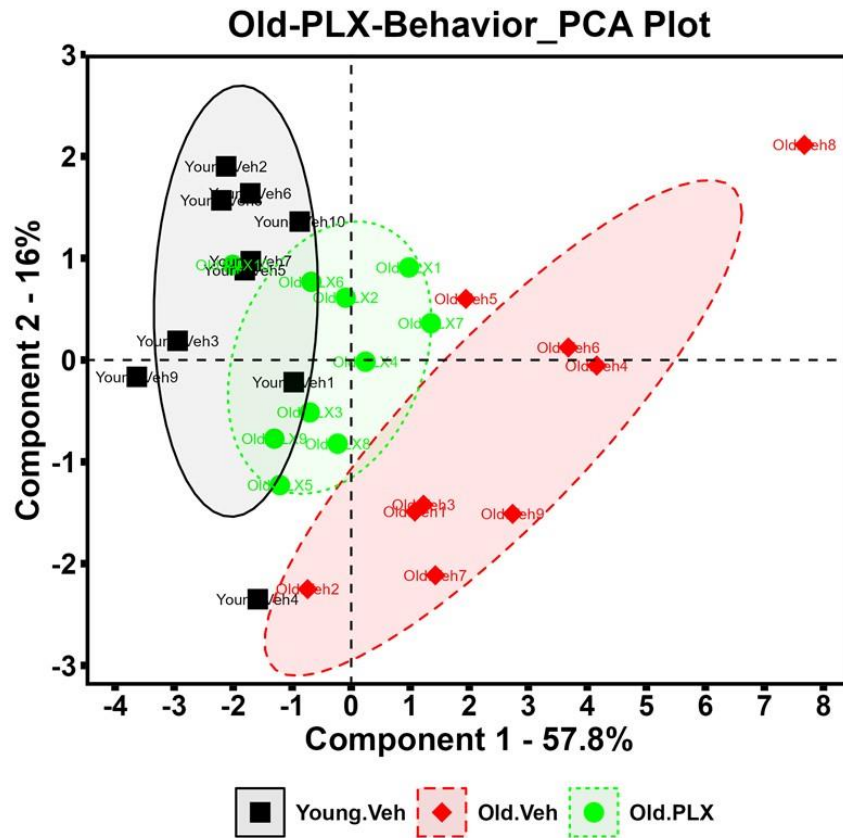

**Fig. S12. Principal component analysis of the complete neurobehavioral dataset after 12 weeks post-repopulation.**

A principal component analysis (PCA) was generated using the behavioral data presented in **Figure 4J-T**. This integrative data analysis illustrates the partial rejuvenating capacity of forced microglia turnover on affective, cognitive, and motor functions late after repopulation. Abbreviations: Veh vehicle.



### Supplemental Figure 13

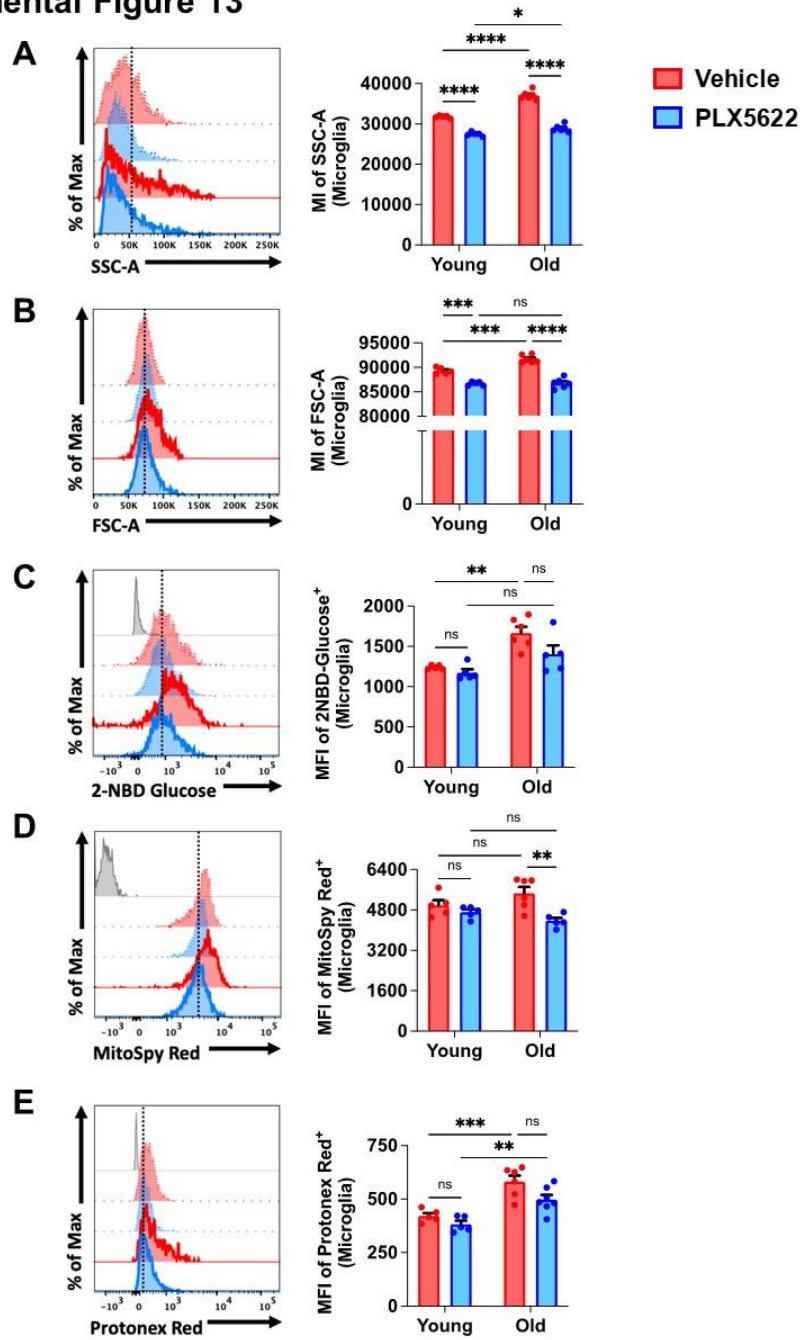

**Fig. S13. Assessment of microglia phenotype at 12 weeks post-repopulation.**

Repopulated microglia from old mice treated with PLX5622 displayed significant reductions in (A) cell granularity, (B) cell volume, (C) glucose uptake, (D) mitochondrial membrane potential, and (E) cytosolic acidosis as evidenced by MFI quantification of the representative histograms. N=4-6/group. Abbreviations: FSC forward scatter, Max maximum, MFI mean fluorescence intensity, ns not significant, SSC side scatter. Data (A-E) were analyzed using two-way ANOVA group analysis with multiple comparison's test (\* $p < 0.05$ , \*\* $p < 0.01$ , \*\*\* $p < 0.001$ , and \*\*\*\* $p < 0.0001$ ).

## Supplemental Figure 14

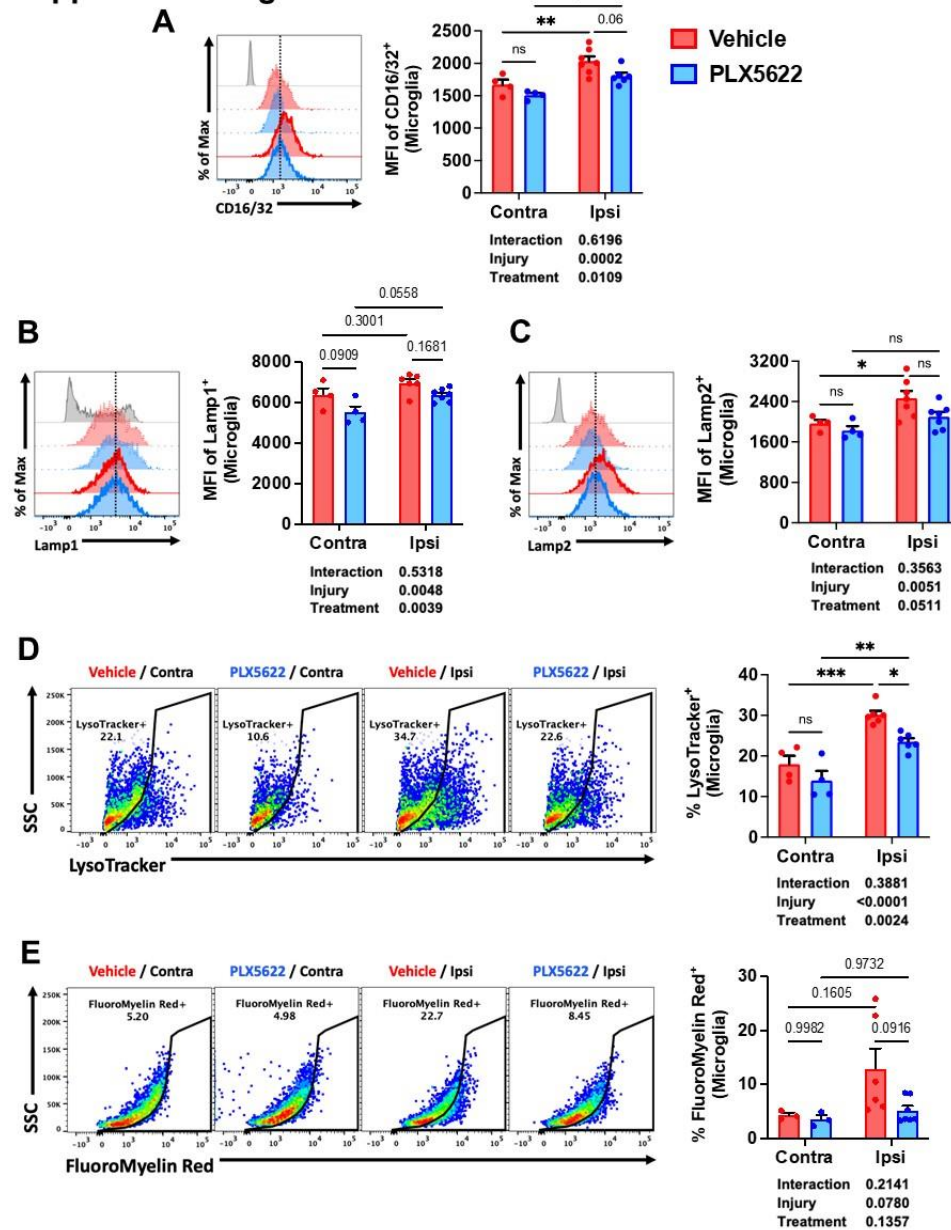

**Fig. S14. Effect of repopulation on microglial phenotype at two weeks post-TBI.**

Old mice were treated with vehicle or PLX5622 for two weeks, followed by 12 weeks of repopulation prior to TBI. Microglia in the injured ipsilateral and contralateral control hemisphere were evaluated for phagocytosis and autophagy markers at 2 weeks post-TBI. Representative histograms and relative MFI quantification show that repopulated microglia exhibit treatment effects in (A) CD16/32, (B) Lamp1, and (C) Lamp2 expression compared to the vehicle group after injury. Representative dot plots also demonstrate significant TBI-related reductions in the frequency of (D) LysoTracker-positive and (E) Fluoromyelin Red-positive microglia. Abbreviations: Contra contralateral, Ipsi ipsilateral, max Maximum, MFI mean fluorescence intensity, ns not significant, SSC side scatter. Data (A-E) were analyzed using two-way ANOVA with multiple comparisons (N=4-7/group; \* $p < 0.05$ , \*\* $p < 0.01$ , and \*\*\* $p < 0.001$ ).

## Supplemental Figure 15

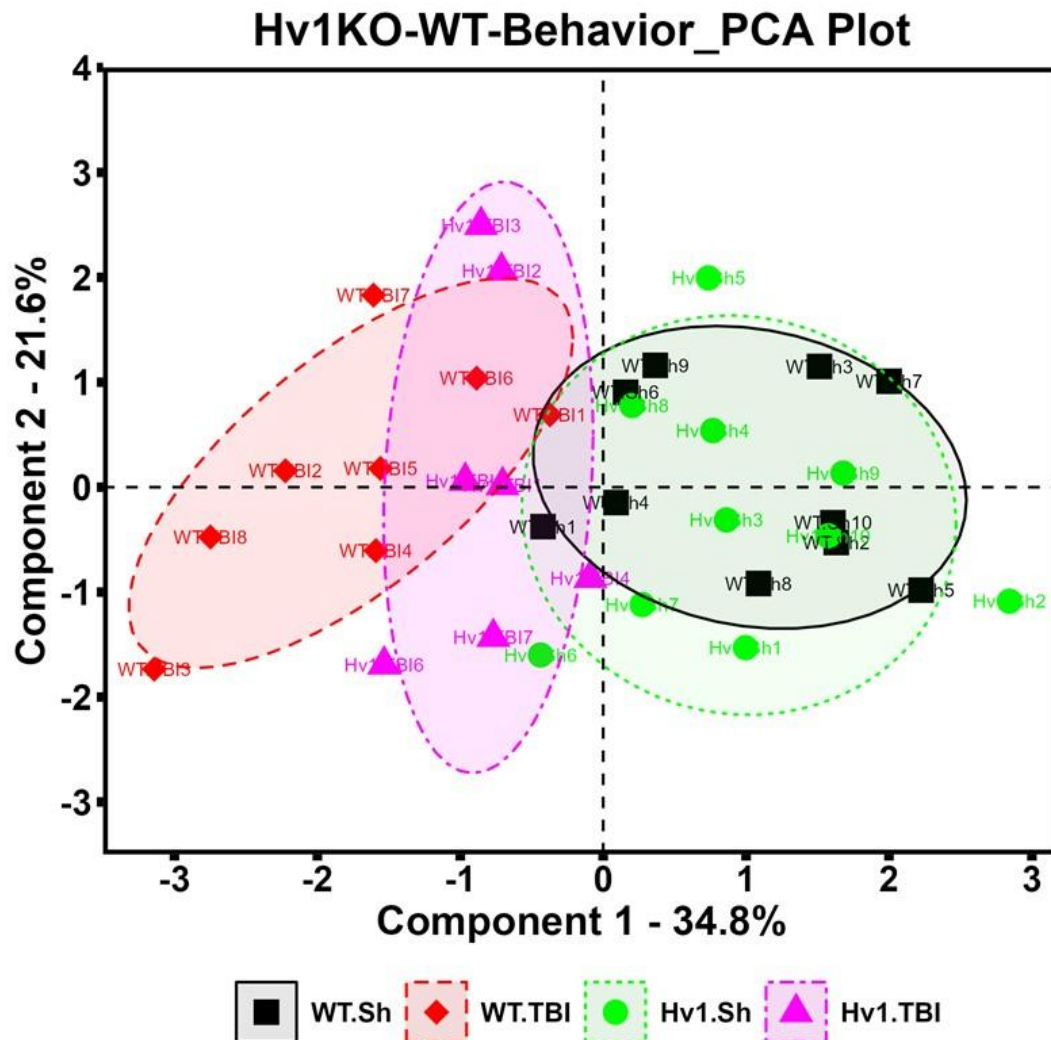

**Fig. S15. Principal component analysis of the complete neurobehavioral dataset at one-year post-TBI in WT and Hv1-knockout mice.**

A principal component analysis (PCA) was generated using the behavioral data presented in **Figure 10E-J**. This integrative data analysis illustrates more simply the attenuating effects of Hv1-knockout on long-term neurological deficits in affective, cognitive, and motor functions late after TBI. Abbreviations: WT wildtype, KO knockout, Sh sham, TBI traumatic brain injury, Hv1 Voltage-gated hydrogen channel 1.

## Supplemental Figure 16

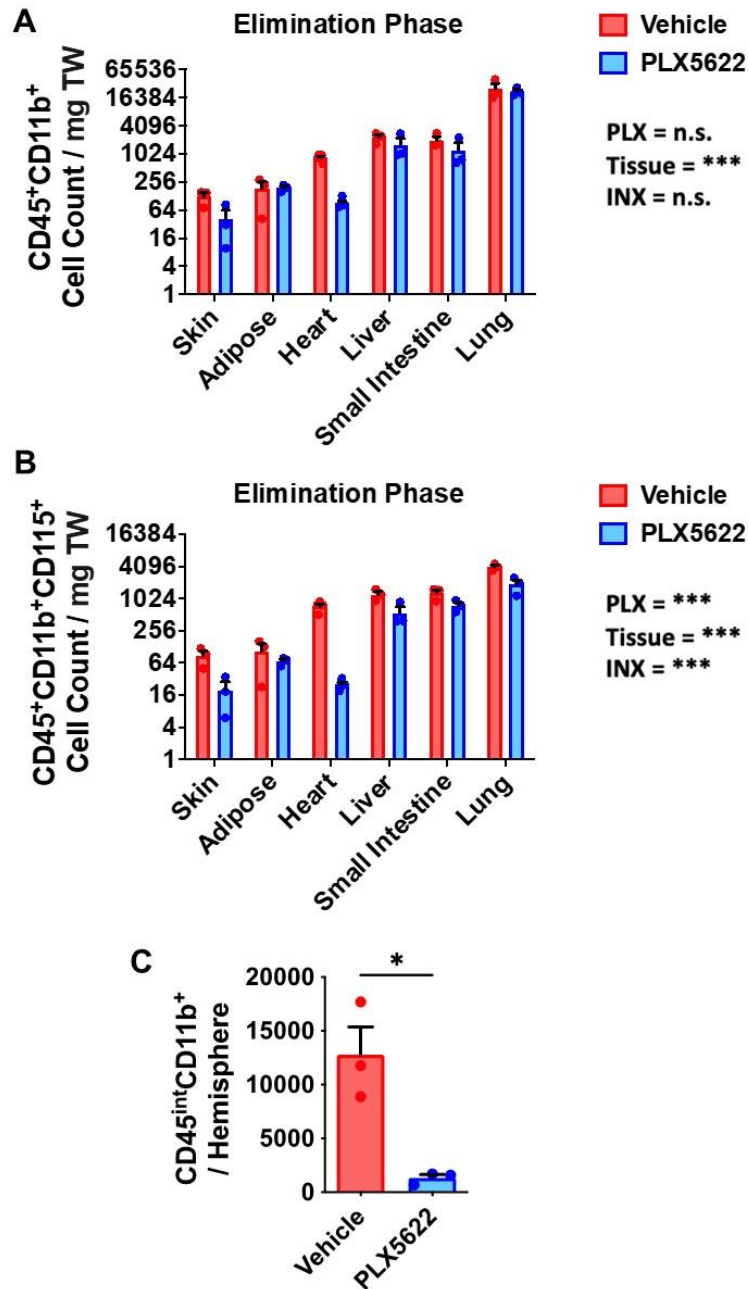

**Fig. S16. Peripheral immune composition following short-term CSF1R inhibition with PLX5622.**

(A) Cell counts of CD45<sup>+</sup>CD11b<sup>+</sup> immune cells in multiple organs was quantified using flow cytometry at two-weeks after continuous treatment with PLX5622 in young male mice. (B) Further refinement of the gating strategy to include CD115<sup>+</sup> cells, which express CSF1R, show even higher significance as evidenced by two-way ANOVA group interaction. (C) The number of brain microglia was significantly reduced during PLX5622 treatment. N=3-5/group. Abbreviations: INX interaction, mg milligrams, PLX Plexxikon 5622, TW tissue weight. Data (A-B) were analyzed using two-way ANOVA with Bonferroni's post-hoc correction. Data (C) were analyzed using Student's t-test (\*p<0.01 and \*\*\*p<0.001).

**Supplemental Table 1 - Genes related to pathway analysis (Figure 3)**  
[https://www.gsea-msigdb.org/gsea/msigdb/human/geneset/GOBP\\_PHAGOCYTOSIS](https://www.gsea-msigdb.org/gsea/msigdb/human/geneset/GOBP_PHAGOCYTOSIS)

| GOBP PHAGOCYTOSIS (M16307) |          |            |            |          |           |         |
|----------------------------|----------|------------|------------|----------|-----------|---------|
| ABCA1                      | CDC42    | ICAM3      | IGHV4-28   | MARCO    | PTPRJ     | TICAM2  |
| ABCA7                      | CDC42SE1 | ICAM5      | IGHV4-31   | MBL2     | PTX3      | TIMD4   |
| ABL1                       | CDC42SE2 | IFNG       | IGHV4-34   | MEGF10   | PYCARD    | TLR2    |
| ADGRB1                     | CEACAM4  | IGHA1      | IGHV4-39   | MERTK    | RAB11FIP2 | TLR4    |
| ADIPOQ                     | CEBPE    | IGHA2      | IGHV4-4    | MESD     | RAB14     | TM9SF4  |
| ADORA1                     | CFP      | IGHD       | IGHV4-59   | MET      | RAB20     | TMEM175 |
| ADORA2A                    | CLCN3    | IGHE       | IGHV4-61   | MFGE8    | RAB27A    | TNF     |
| AHSG                       | CLEC7A   | IGHG1      | IGHV5-10-1 | MIR17    | RAB31     | TRBC1   |
| AIF1                       | CLN3     | IGHG2      | IGHV5-51   | MIR181B1 | RAB34     | TRBC2   |
| ALOX15                     | CNN2     | IGHG3      | IGHV6-1    | MIR183   | RAB39A    | TRDC    |
| ANO6                       | COLEC10  | IGHG4      | IGHV7-4-1  | MIR20A   | RAB5A     | TREM2   |
| ANXA1                      | COLEC11  | IGHM       | IGHV7-81   | MSR1     | RAB7A     | TREX1   |
| ANXA11                     | COLEC12  | IGHV1-18   | IGKC       | MST1R    | RAB7B     | TUB     |
| ANXA3                      | CORO1A   | IGHV1-24   | IGLC1      | MYD88    | RAC1      | TULP1   |
| APOA1                      | CORO1C   | IGHV1-3    | IGLC2      | MYH9     | RAC2      | TUSC2   |
| APOA2                      | CRP      | IGHV1-45   | IGLC3      | MYO18A   | RACK1     | TYRO3   |
| APPL1                      | CRYBA1   | IGHV1-58   | IGLC6      | MYO1G    | RARA      | TYROBP  |
| APPL2                      | CSK      | IGHV1-69   | IGLC7      | MYO7A    | RHOBTB1   | UNC13D  |
| ARHGAP12                   | CYBA     | IGHV1-69-2 | IGLL1      | NCF2     | RHOBTB2   | VAMP7   |
| ARHGAP25                   | DNM2     | IGHV1-69D  | IGLL5      | NCF4     | RHOG      | VAV1    |
| ARL8B                      | DOCK1    | IGHV2-26   | IL15       | NCKAP1L  | RHOH      | VAV2    |
| ATG3                       | DOCK2    | IGHV2-5    | IL15RA     | NOD2     | RUBCN     | VAV3    |
| ATG5                       | DYSF     | IGHV2-70   | IL1B       | OLFM4    | SCARB1    | VIPAS39 |
| AXL                        | EIF2AK1  | IGHV2-70D  | IL2RB      | P2RX7    | SFTPA1    | VPS33B  |
| AZU1                       | ELANE    | IGHV3-11   | IL2RG      | P2RY6    | SFTPD     | XKR4    |
| BCR                        | ELMO1    | IGHV3-13   | IRF8       | PAK1     | SH3BP1    | XKR5    |
| BECN1                      | ELMO2    | IGHV3-15   | ITGA2      | PEAR1    | SIRPA     | XKR6    |
| BIN2                       | ELMO3    | IGHV3-16   | ITGAL      | PECAM1   | SIRPB1    | XKR7    |
| BTK                        | F2RL1    | IGHV3-20   | ITGAM      | PIK3CA   | SIRPG     | XKR8    |
| C1orf43                    | FCER1G   | IGHV3-21   | ITGAV      | PIKFYVE  | SLAMF1    | XKR9    |
| C2                         | FCGR1A   | IGHV3-23   | ITGB1      | PIP4P2   | SLC11A1   | YES1    |
| C3                         | FCGR2B   | IGHV3-30   | ITGB2      | PIP5K1A  | SNX3      |         |
| C4A                        | FCN1     | IGHV3-33   | ITGB3      | PIP5K1C  | SOD1      |         |
| C4B                        | FCN2     | IGHV3-35   | JMJD6      | PLA2G5   | SPACA3    |         |
| C4BPA                      | FCN3     | IGHV3-38   | KIAA1109   | PLA2G6   | SPG11     |         |
| C4BPB                      | FER1L5   | IGHV3-43   | LBP        | PLCG2    | SPHK1     |         |
| CALR                       | FGR      | IGHV3-48   | LDLR       | PLD2     | SPON2     |         |
| CAMK1D                     | FPR2     | IGHV3-49   | LEP        | PLD4     | SRC       |         |
| CCL2                       | FYN      | IGHV3-53   | LEPR       | PLPP4    | SRPX      |         |
| CD14                       | GAS6     | IGHV3-64   | LETMD1     | PLSCR1   | STAP1     |         |
| CD300A                     | GATA2    | IGHV3-64D  | LIMK1      | PRKCD    | SYK       |         |
| CD300LF                    | GSN      | IGHV3-66   | LMAN2      | PRKCE    | SYT11     |         |
| CD302                      | GULP1    | IGHV3-7    | LRP1       | PRKCG    | SYT7      |         |
| CD36                       | HAVCR1   | IGHV3-72   | LYAR       | PRTN3    | TAF4A     |         |
| CD47                       | HCK      | IGHV3-73   | LYN        | PTK2     | TGM2      |         |
| CD93                       | HMGB1    | IGHV3-74   | LYST       | PTPRC    | THBS1     |         |

[https://www.gsea-msigdb.org/gsea/msigdb/human/geneset/GOBP\\_REGULATION\\_OF\\_AUTOPHAGY](https://www.gsea-msigdb.org/gsea/msigdb/human/geneset/GOBP_REGULATION_OF_AUTOPHAGY)

| GOBP REGULATION OF AUTOPHAGY (M10281) |         |         |          |          |         |          |
|---------------------------------------|---------|---------|----------|----------|---------|----------|
| ABL1                                  | CAMKK2  | EXOC1   | KAT5     | NPRL3    | RNF5    | TBC1D25  |
| ABL2                                  | CAPN1   | EXOC4   | KAT8     | NRBP2    | ROCK1   | TBK1     |
| ACER2                                 | CAPNS1  | EXOC7   | KAT8     | NUPR1    | RPTOR   | TECPR1   |
| ADRA1A                                | CASP3   | EXOC8   | KDM4A    | OPTN     | RRAGA   | TFEB     |
| ADRB2                                 | CCNY    | FBXL2   | KDR      | ORMDL3   | RRAGB   | TICAM1   |
| AKT1                                  | CDK16   | FBXO7   | KEAP1    | OSBPL7   | RRAGC   | TIGAR    |
| AMBRA1                                | CDK5    | FBXW7   | KIF25    | PAFAH1B2 | RRAGD   | TLK2     |
| ATF6                                  | CDK5R1  | FEZ1    | KLHL22   | PARK7    | RUBCN   | TLR9     |
| ATG101                                | CERS1   | FEZ2    | LACRT    | PARL     | RUFY4   | TMEM39A  |
| ATG12                                 | CHMP4A  | FLCN    | LAMP3    | PHF23    | SCFD1   | TMEM59   |
| ATG13                                 | CHMP4B  | FOXK1   | LARP1    | PIK3C2A  | SCOC    | TOM1     |
| ATG14                                 | CISD1   | FOXK2   | LEP      | PIK3C3   | SEC22B  | TP53     |
| ATG16L1                               | CISD2   | FOXO1   | LEPR     | PIK3CA   | SESN1   | TP53INP1 |
| ATG2A                                 | CLEC16A | FOXO3   | LRRK2    | PIK3CB   | SESN2   | TP53INP2 |
| ATG5                                  | CLN3    | FYCO1   | LRSAM1   | PIK3R2   | SESN3   | TPCN1    |
| ATM                                   | CPTP    | FZD5    | LZTS1    | PIK3R4   | SH3BP4  | TPCN2    |
| ATP13A2                               | CRYBA1  | GAPDH   | MAGEA3   | PIM2     | SH3GLB1 | TREM2    |
| ATP6V0A1                              | CSNK2A2 | GATA4   | MAGEA6   | PINK1    | SIRT1   | TRIB3    |
| ATP6V0A2                              | CTSA    | GBA     | MAP3K7   | PIP4K2A  | SIRT2   | TRIM13   |
| ATP6V0B                               | CTTN    | GFAP    | MAPK15   | PIP4K2B  | SLC25A4 | TRIM14   |
| ATP6V0C                               | DAP     | GNAI3   | MAPK3    | PIP4K2C  | SLC25A5 | TRIM21   |
| ATP6V0D1                              | DAPK1   | GOLGA2  | MAPK8    | PLEKHF1  | SLC7A5  | TRIM22   |
| ATP6V0D2                              | DAPK2   | GPR137  | MAPT     | PLK2     | SMCR8   | TRIM27   |
| ATP6V0E1                              | DAPK3   | GPR137B | MCL1     | PLK3     | SMG1    | TRIM32   |
| ATP6V0E2                              | DAPL1   | GPSM1   | MEFV     | POLDIP2  | SNCA    | TRIM34   |
| ATP6V1A                               | DCAF12  | GSK3A   | MET      | PRKAA1   | SNRNP70 | TRIM38   |
| ATP6V1B1                              | DCN     | GSK3B   | MFSD8    | PRKAA2   | SNX18   | TRIM5    |
| ATP6V1B2                              | DDIT3   | HAX1    | MID2     | PRKACA   | SNX30   |          |
| ATP6V1C1                              | DEPDC5  | HDAC6   | MIR199A1 | PRKD1    | SNX32   |          |
| ATP6V1C2                              | DEPP1   | HERC1   | MIRLET7B | PRKN     | SNX4    |          |
| ATP6V1D                               | DHRSX   | HGF     | MLST8    | PSAP     | SNX5    |          |
| ATP6V1E1                              | DNM1L   | HIF1A   | MOAP1    | PTPN22   | SNX6    |          |
| ATP6V1E2                              | DRAM1   | HMGB1   | MT3      | PYCARD   | SNX7    |          |
| ATP6V1G1                              | DRAM2   | HMOX1   | MTCL1    | QSOX1    | SOGA1   |          |
| ATP6V1G2                              | EEF1A1  | HSPB1   | MTDH     | RAB39B   | SOGA3   |          |
| ATP6V1H                               | EEF1A2  | HSPB8   | MTM1     | RAB3GAP1 | SPTLC1  |          |
| BAD                                   | EHMT2   | HTR2B   | MTMR3    | RAB3GAP2 | SPTLC2  |          |
| BAG3                                  | EIF4E   | HTRA2   | MTMR4    | RAB8A    | SREBF1  |          |
| BCL2                                  | EIF4G1  | HTT     | MTMR8    | RALB     | SREBF2  |          |
| BCL2L11                               | EIF4G2  | IFI16   | MTMR9    | RASIP1   | STAT3   |          |
| BECN1                                 | EIF4G3  | IFNG    | MTOR     | RB1CC1   | STING1  |          |
| BMF                                   | ELAPOR1 | IKBKG   | NEDD4    | RHEB     | STK11   |          |
| BNIP3                                 | ENDOG   | IL10    | NLRP6    | RIPK2    | SUPT5H  |          |
| BNIP3L                                | EP300   | IL10RA  | NOD1     | RMC1     | SVIP    |          |
| BOK                                   | EPM2A   | IL4     | NOD2     | RNF152   | TAB2    |          |
| C9orf72                               | ERCC4   | IRGM    | NPC1     | RNF31    | TAB3    |          |
| CALCOCO2                              | ERN1    | ITPR1   | NPRL2    | RNF41    | TBC1D14 |          |

[https://www.gsea-msigdb.org/gsea/msigdb/human/geneset/GOBP\\_REGULATION\\_OF\\_REACTIVE\\_OXYGEN\\_SPECIES\\_BIOSYNTHETIC\\_PROCESS](https://www.gsea-msigdb.org/gsea/msigdb/human/geneset/GOBP_REGULATION_OF_REACTIVE_OXYGEN_SPECIES_BIOSYNTHETIC_PROCESS)

| GOBP REGULATION OF REACTIVE OXYGEN SPECIES BIOSYNTHETIC PROCESS (M15379) |        |          |         |          |          |        |
|--------------------------------------------------------------------------|--------|----------|---------|----------|----------|--------|
| ABCB7                                                                    | CD36   | DUOXA2   | MIR21   | MTCO2P12 | RAB27A   | SOD2   |
| ABCD1                                                                    | CFLAR  | FOXO3    | MIR24-1 | NDUFC2   | RHOA     | SPHK2  |
| ABCD2                                                                    | CLCN3  | FYN      | MIR590  | PAGE4    | SLC18A2  | TLR4   |
| ADGRB1                                                                   | COA8   | GRIN1    | MIR675  | PARK7    | SLC25A33 | TLR6   |
| ALOX5                                                                    | CTNS   | H19      | MMP8    | PIKFYVE  | SLC30A10 | TRAP1  |
| ARG2                                                                     | CYBA   | INS      | MPV17L  | PLCG2    | SLC5A3   | UCP1   |
| CCN6                                                                     | DUOXA1 | MIR181A2 | MT-CO2  | PPARA    | SNCA     | ZNF205 |

[(1) Y. Hu, et al., Cell Rep. 2021 Jun 8;35(10):109228. doi: 10.1016/j.celrep.2021.109228.]

| DAM/SENESCENCE |      |      |        |        |       |          |
|----------------|------|------|--------|--------|-------|----------|
| Cst7           | Lpl  | Spp1 | Itgax  | Cdkn1a | Casp8 | Glb1     |
| Csf1           | Apoe | Cd74 | Cdkn2a | Cdkn2d | Il1b  | Serpine1 |
